# Supplementary material
Source: Hindawi journal article supplement (doi:10.1155/2011/569416)
Supplement: f1 [file 569416.f1.pdf]

## **Cytotoxicity and induction of inflammation by pepsin in acid in bronchial epithelial cells**

Erik Bathoorn<sup>1,2</sup>, Paul Daly<sup>1</sup>, Birgit Gaiser<sup>1</sup>, Karl Sternad<sup>1</sup>, Craig Poland<sup>1</sup>, William MacNee<sup>1</sup>,  
and Ellen M Drost<sup>1</sup>

<sup>1</sup>ELEGI, Colt Research Labs, MRC Centre for Inflammation Research, Queen's Medical  
Research Institute, University of Edinburgh, Edinburgh, United Kingdom <sup>2</sup>Department of  
Medical Microbiology, University Medical Center Utrecht, the Netherlands

**Online supplement**

*Figures presenting effects of pepsin on cell survival and induction of cytokine release of all the pepsin concentrations and pH levels used in the statistical analysis*

**Figure 1: Decrease of cell proliferation produced by pepsin exposure: effect of pepsin and pH**

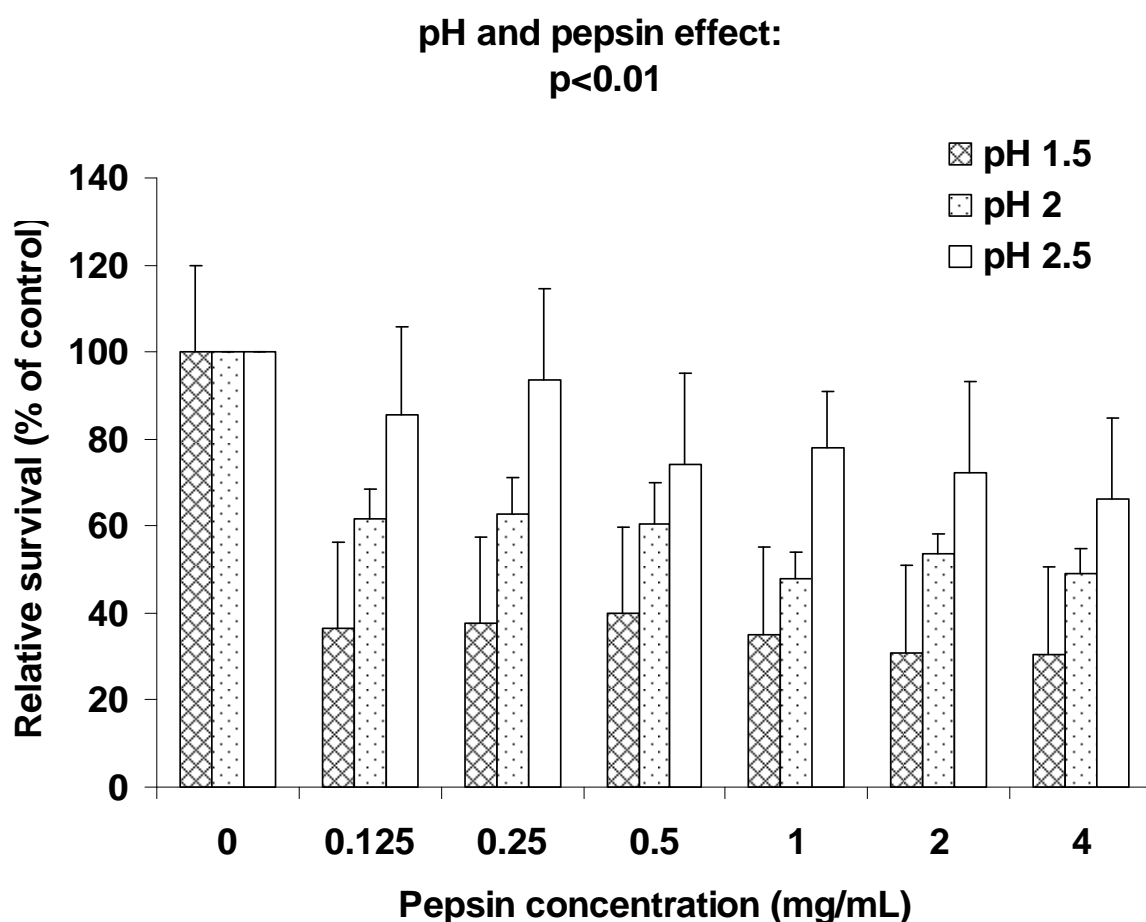

Cell proliferation was measured by absorbance, and expressed as a % of absorbance of treatment with the corresponding pH without pepsin (control). Pepsin induced a significant decrease in cell proliferation independent of pH ( $F=6.5$ ;  $p<0.01$ ) and this pepsin induced decreased cell proliferation is significantly different between the pH levels used for exposure ( $F=17.4$ ;  $p<0.01$ ). Data are expressed as means (histograms) and SEM (bars) for 3 replicates.

**Figure 2: Induction of IL-6 release by pepsin: effect of pepsin and pH**

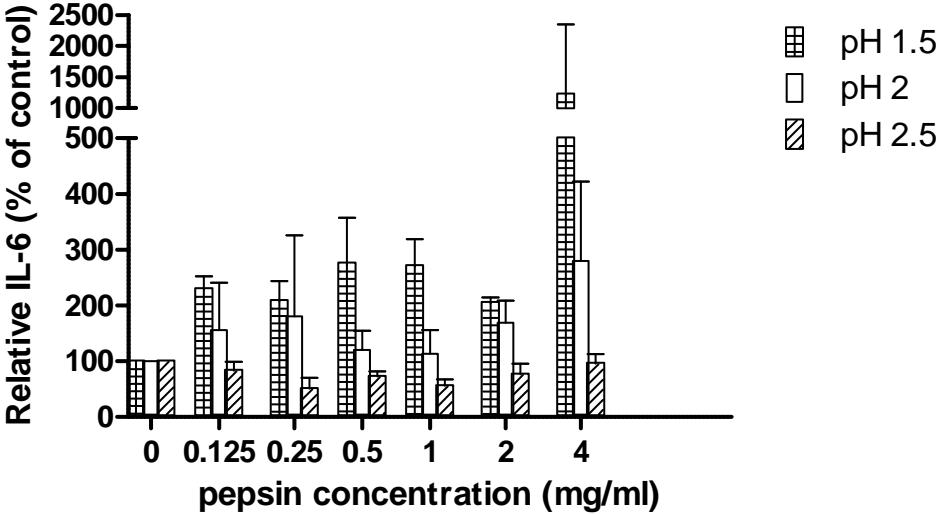

Interleukin-6 was corrected for cell proliferation and expressed as a % of exposure with the corresponding pH without pepsin (control). There is a trend for differences in pepsin-induced interleukin-6 release between the pH levels ( $F=2.5$ ;  $p=0.09$ ). Interleukin-6 release induced by pepsin is higher at pH 1.5 compared to pH 2.5 (mean difference 283%;  $p=0.03$ ). Data are expressed as means (histograms) and SEM (bars) for 3 replicates.

**Figure 3: Induction of IL-8 release by pepsin: effect of pepsin and pH**

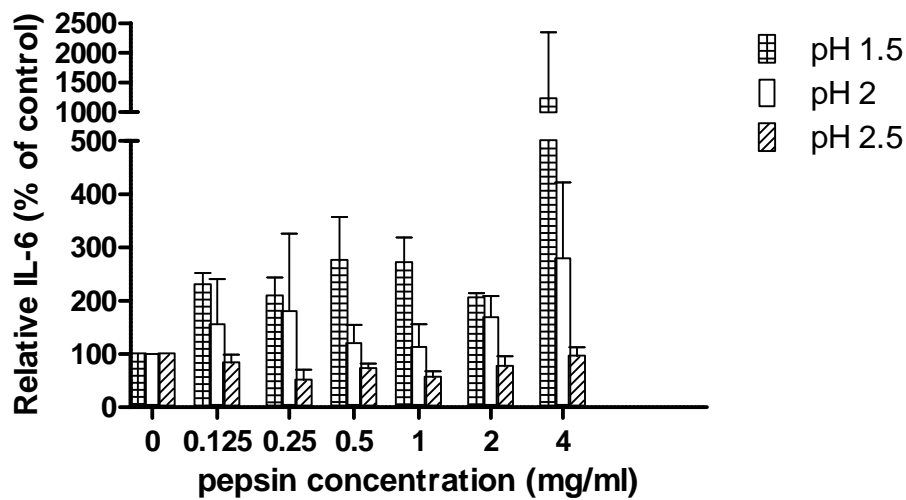

Interleukin-8 was corrected for cell proliferation and expressed as a % of exposure with the corresponding pH without pepsin (control). There is a difference in interleukin-8 release induced by pepsin between the pH levels ( $F=5.1$ ;  $p<0.01$ ). Interleukin-8 release induced by pepsin is higher at pH 1.5 compared to pH 2.5 (mean difference 221%;  $p<0.01$ ). Data expressed as mean (histograms) and SEM (bars) for 3 replicates.
